# Supplementary material for: Radiobiological meta-analysis of the response of prostate cancer to high dose rate brachytherapy
Source: bioRxiv or medRxiv preprint supplement (doi:10.1101/2024.07.12.24310000), 2024-07-14
Supplement: Supplementary file [file media-1.pdf]

# Supplementary Materials for “Radiobiological meta-analysis of the response of prostate cancer to high dose rate brachytherapy”

## 1. Calculation of the EQD2 for different models

The equivalent dose in 2 Gy fractions, EQD2, of a given schedule is calculated by imposing iso-effectiveness with a 2 Gy/fraction treatment. There is some ambiguity in the calculation of the EQD2 regarding the effects that are included in the computation of the effectiveness of the 2 Gy/fraction treatment. Here, we will follow [14] and include *dose effects* (like the moderation of the quadratic term with increasing dose in the LQL model), but will ignore *time effects* (like incomplete repair or proliferation), which would require to assign a given schedule to the 2 Gy/fraction treatment (e.g. weekends off or not). The form of the EQD2 for each model can be calculated analytically as:

### LQ model

$$EQD2_{LQ} = \frac{\left( D + \frac{dD}{(\alpha/\beta)} - \left( \frac{\lambda}{\alpha} \right) \max(0, T - T_k) \right)}{\left( 1 + \frac{2}{(\alpha/\beta)} \right)}$$

If we include the effect of sublethal damage incomplete repair we obtain:

$$EQD2_{LQ,SD} = \frac{\left( D + \frac{dD}{(\alpha/\beta)} + \frac{2d^2 \sum_{k=1}^n \left( \sum_{p=1}^{k-1} \left( \prod_{q=p}^{k-1} \theta_q \right) \right)}{(\alpha/\beta)} - \left( \frac{\lambda}{\alpha} \right) \max(0, T - T_k) \right)}{\left( 1 + \frac{2}{(\alpha/\beta)} \right)}$$

### LQL model

$$EQD2_{LQL} = \frac{\left( D + \frac{2(\delta d + \exp(-\delta d) - 1)D}{(\alpha/\beta)d\delta^2} - \left( \frac{\lambda}{\alpha} \right) \max(0, T - T_k) \right)}{\left( 1 + \frac{2\delta + \exp(-2\delta) - 1}{(\alpha/\beta)\delta^2} \right)}$$

If we include the effect of sublethal damage incomplete repair we obtain:

$$EQD2_{LQL,SD} = \frac{\left( D + \frac{dD(\delta d + \exp(-\delta d) - 1)}{(\alpha/\beta)(\delta d)^2} + \frac{2d^2(\delta d + \exp(-\delta d) - 1) \sum_{k=1}^n \left( \sum_{p=1}^{k-1} \left( \prod_{q=p}^{k-1} \theta_q \right) \right)}{(\alpha/\beta)(\delta d)^2} - \left( \frac{\lambda}{\alpha} \right) \max(0, T - T_k) \right)}{\left( 1 + \frac{(2\delta + \exp(\delta d) - 1)}{(\alpha/\beta)\delta^2} \right)}$$

### Re-oxygenation model

$$EQD2_S = \frac{\frac{1}{\alpha_0} \left( \sum_{i=1}^n \alpha_i d_i + \sum_{i=1}^n \beta_i d_i^2 - \lambda \max(0, T - T_k) \right)}{1 + \frac{2}{(\alpha_0/\beta_0)}}$$

where  $\alpha_i$  and  $\beta_i$  refer to the values of  $\alpha$  and  $\beta$  at the time  $t=t_i$  of delivery of the  $i$ -th fraction.

If we include the effect of sublethal damage incomplete repair we obtain:

$$EQD2_{S,SD} = \frac{\frac{1}{\alpha_0} \left( \sum_{i=1}^n \alpha_i d_i + \sum_{i=1}^n \beta_i d_i^2 + 2 \sum_{i=1}^n \beta_i d_i \left( \sum_{p=1}^{i-1} d_p \left( \prod_{q=p}^{i-1} \theta_q \right) \right) - \lambda \max(0, T - T_k) \right)}{1 + \frac{2}{(\alpha_0/\beta_0)}}$$

## 2. Supplementary Tables

**Supplementary Table 1:** Detailed information of the analyzed schedules for low (LR) and intermediate risk (IR) prostate cancer, including: number of patients (N); dose per fraction (d); number of fractions (n); total dose (D); irradiation schedule derived from the publications, and presented as the time in hours at which each fraction is delivered (for modeling incomplete repair between fractions); overall treatment time (OTT, defined as treatment time - 1 day for modeling proliferation); percentage of patients receiving ADT, control at five years (TCP); and the first author and year of the study.

| Risk | N               | d (Gy) | n | D (Gy) | Schedule (hours)           | OTT (days)      | ADT (%)           | TCP (%) | Reference         |
|------|-----------------|--------|---|--------|----------------------------|-----------------|-------------------|---------|-------------------|
| LR   | 288             | 7.25   | 6 | 43.5   | [0 6 24 168 174 192]       | 8               | 0.0*              | 98.7    | Hauswald (2015)   |
| LR   | 19              | 10.0   | 3 | 30.0   | [0 6 24]                   | 1               | 26.3              | 82.3    | Barkati (2012)    |
| LR   | 198             | 11.5   | 3 | 34.5   | [0 504 1008]               | 42              | 5.0               | 96.1    | Strouthos (2017)  |
| LR   | 47 <sup>a</sup> | 15.0   | 3 | 45.0   | [0 480 984]                | 41 <sup>e</sup> | 87.0              | 96.7    | Kukielka (2015)   |
| LR   | 233             | 9.5    | 4 | 38.0   | [0 6 24 30]                | 1               | 0.0**             | 98.0    | Jawad (2015)      |
| LR   | 48              | 12.0   | 2 | 24.0   | [0 6]                      | 0               | 0.0***            | 92.0    | Jawad (2015)      |
| LR   | 56              | 13.5   | 2 | 27.0   | [0 6]                      | 0               | 0.0 <sup>+</sup>  | 100.0   | Jawad (2015)      |
| LR   | 44              | 19.0   | 1 | 19.0   | [0]                        | 0               | 34.0              | 66.0    | Prada (2016)      |
| LR   | 103             | 9.5    | 4 | 38.0   | [0 24 30 48]               | 2               | 0.0 <sup>++</sup> | 99.4    | Behmueller (2021) |
| LR   | 19              | 9.5    | 4 | 38.0   | [0 6 24 30]                | 1               | 0.0               | 89.0    | Johansson (2021)  |
| LR   | 85              | 11.0   | 3 | 33.0   | [0 336 672]                | 27              | 0.0               | 99.0    | Johansson (2021)  |
| LR   | 69              | 14.0   | 2 | 28.0   | [0 336]                    | 13              | 0.0               | 98.0    | Johansson (2021)  |
| LR   | 23              | 19.0   | 1 | 19.0   | [0]                        | 0               | 0.0               | 84.3    | Morton (2020)     |
| LR   | 16              | 13.5   | 2 | 27.0   | [0 168]                    | 7               | 0.0               | 99.7    | Morton (2020)     |
| LR   | 196             | 9.5    | 4 | 38.0   | [0 6 336 342]              | 13              | 3.6               | 94.0    | Tselis (2013)     |
| LR   | 84 <sup>b</sup> | 13.5   | 2 | 27.0   | [0 6]                      | 0               | 32.7              | 96.0    | Nagore (2018)     |
| LR   | 26              | 7.0    | 7 | 49.0   | [0 6 24 30 48 54 72]       | 3               | 7.7               | 100.0   | Yamazaki (2018)   |
| LR   | 2               | 6.0    | 9 | 54.0   | [0 6 24 30 48 54 72 78 96] | 4               | 0.0               | 100.0   | Yamazaki (2018)   |
| LR   | 22              | 20.5   | 1 | 20.5   | [0]                        | 0               | 68.2              | 82.0    | Prada (2018)      |
| LR   | 25 <sup>c</sup> | 20.0   | 1 | 20.0   | [0]                        | 0               | 0.0               | 73.5    | Levi (2022)       |
| LR   | 40 <sup>d</sup> | 19.0   | 1 | 19.0   | [0]                        | 0               | 0.0               | 73.4    | Siddiqui (2019)   |

\*42 patients out of 448 (288 LR and 160 IR) received ADT. Because ADT is most likely prescribed to HR/IR patients, we assumed that 0/288 LR patients received ADT.

\*\* 61 patients out of 319 (233 LR, 86 IR) received ADT. Because ADT is most likely prescribed to HR/IR patients, we assumed that 0/233 LR patients received ADT.

\*\*\* 4 patients out of 79 (48 LR, 31 IR) received ADT. Because ADT is most likely prescribed to HR/IR patients, we assumed that 0/48 LR patients received ADT.

<sup>+</sup>3 patients out of 96 (56 LR, 40 IR) received ADT. Because ADT is most likely prescribed to HR/IR patients, we assumed that 0/96 LR patients received ADT.

<sup>++</sup>33 patients out of 141 (103 LR, 32 IR, 6 HR) received ADT. Because ADT is most likely prescribed to HR/IR patients, we assumed that 0/103 LR patients received ADT.

<sup>a</sup>47 out of 77 patients were LR (61%). Biochemical control (BC) was not specified by risk group, and we assigned the overall BC (96.7%) to the LR group.

<sup>b</sup>84 out of 119 patients were LR (71%). Biochemical control (BC) was not specified by risk group, and we assigned the overall BC (96.0%) to the LR group.

<sup>c</sup>25 out of 33 were LR (76%). Biochemical control (BC) was not specified by risk group, and we assigned the overall BC (73.5%) to the LR group.

<sup>d</sup>40 out of 68 patients were LR (59%). Biochemical control (BC) was not specified by risk group, but the study found “No significant difference between low- and intermediate-risk patients”. We assigned the overall BC (73.5%) to the LR group.

<sup>e</sup> median value

|    |       |       |   |      |                            |                 |      |         |                   |
|----|-------|-------|---|------|----------------------------|-----------------|------|---------|-------------------|
| IR | 54*   | 6.50  | 7 | 45.5 | [0 6 24 30 48 54 72]       | 3               | 44.3 | 93.0    | Yoshioka (2016)   |
| IR | 160   | 7.25  | 6 | 43.5 | [0 6 24 168 174 192]       | 8               | 26.3 | 97.6    | Hauswald (2015)   |
| IR | 284   | 6.50  | 6 | 39.0 | [0 5 24 408 413 432]       | 18 <sup>+</sup> | 16.2 | 94.4    | Rogers (2015)     |
| IR | 190** | 7.25  | 6 | 43.5 | [0 6 24 168 174 192]       | 8               | 0.0  | 97.0    | Patel (2016)      |
| IR | 135   | 11.50 | 3 | 34.5 | [0 504 1008]               | 42              | 11.9 | 96.1    | Strouthos (2017)  |
| IR | 86    | 9.50  | 4 | 38.0 | [0 6 24 30]                | 1               | 70.9 | 95.0    | Jawad (2015)      |
| IR | 31    | 12.00 | 2 | 24.0 | [0 6]                      | 0               | 12.9 | 81.0    | Jawad (2015)      |
| IR | 40    | 13.50 | 2 | 27.0 | [0 6]                      | 0               | 7.5  | 79.0    | Jawad (2015)      |
| IR | 28    | 19.50 | 1 | 19.5 | [0]                        | 0               | 53.6 | 94.4    | Hoskin (2017)     |
| IR | 69    | 13.00 | 2 | 26.0 | [0 6]                      | 0               | 52.2 | 95.0    | Hoskin (2017)     |
| IR | 49    | 10.50 | 3 | 31.5 | [0 6 24]                   | 1               | 71.0 | 94.0    | Hoskin (2017)     |
| IR | 32    | 9.50  | 4 | 38.0 | [0 24 30 48]               | 2               | 84.4 | 97.2    | Behmueller (2021) |
| IR | 22    | 11.00 | 3 | 33.0 | [0 336 672]                | 27              | 0.0  | 86.0    | Johansson (2021)  |
| IR | 34    | 14.00 | 2 | 28.0 | [0 336]                    | 13              | 0.0  | 72.0    | Johansson (2021)  |
| IR | 64    | 19.00 | 1 | 19.0 | [0]                        | 0               | 0.0  | 69.9*** | Morton (2020)     |
| IR | 67    | 13.50 | 2 | 27.0 | [0 168]                    | 7               | 0.0  | 94.1*** | Morton (2020)     |
| IR | 81    | 9.50  | 4 | 38.0 | [0 6 336 342]              | 13              | 23.5 | 92.0    | Tselis (2013)     |
| IR | 48    | 6.50  | 7 | 45.5 | [0 6 24 30 48 54 72]       | 3               | 22.9 | 89.0    | Yamakazi (2018)   |
| IR | 52    | 7.00  | 7 | 49.0 | [0 6 24 30 48 54 72]       | 3               | 96.2 | 99.6    | Yamakazi (2018)   |
| IR | 39    | 6.00  | 9 | 54.0 | [0 6 24 30 48 54 72 78 96] | 4               | 76.9 | 97.8    | Yamakazi (2018)   |
| IR | 34    | 20.50 | 1 | 20.5 | [0]                        | 0               | 14.7 | 79.0    | Prada (2018)      |
| IR | 16    | 19.00 | 1 | 19.0 | [0]                        | 0               | 31.3 | 63.0    | Prada (2016)      |

\*62% of the 79 patients were treated with this treatment plan. Other fractionations were employed, but since BC is not specified separately, we assigned the overall BC (93%) to this fractionation.

\*\*83% of the patients received this treatment plan. Other fractionations were employed, but since BC is not specified separately, we assigned the overall BC (93%) to this fractionation.

\*\*\* weighted average of the BC for IR favourable group and IR unfavourable group.

+ mean value

**Supplementary Table 2:** 95% confidence intervals of best fitting parameters ( $\alpha/\beta$ ,  $\delta$ ) for the LQ and LQL models without incomplete repair correction. Results are separated by risk, low (LR) and intermediate (IR). The values of  $\alpha/\beta$  were not constrained to be low ( $1 \leq \alpha/\beta \leq 100$  Gy). The symbol \* indicates that the parameter value reached the edge of the constraint window.

| Risk | Model | Parameters          |                              |
|------|-------|---------------------|------------------------------|
|      |       | $\alpha/\beta$ [Gy] | $\delta$ [Gy <sup>-1</sup> ] |
| LR   | LQ    | [27.8, 100*]        | -                            |
|      | LQL   | [1*, 100*]          | [0*, 1*]                     |
| IR   | LQ    | [16.6, 100*]        | -                            |
|      | LQL   | [1*, 100*]          | [0*, 1*]                     |
